# Supplementary material for: Enhancing the interfacial stability of LiNi0.8Co0.15Al0.05O2 cathode materials by a surface-concentration gradient strategy
Source: Royal Society of Chemistry journal article supplement (doi:10.1039/d1dt02379a), 2021-01-01
Supplement: d1dt02379a1.pdf [file d1dt02379a1.pdf]

## Supporting Information

### Enhancing interfacial stability of $\text{LiNi}_{0.8}\text{Co}_{0.15}\text{Al}_{0.05}\text{O}_2$ cathode materials by surface-concentration gradient strategy

Xin'an Zhou,<sup>a</sup> Feilong Zhang,<sup>a,b</sup> Chao Wang,<sup>a</sup> Xiaolan Fu,<sup>a</sup> Bo Wang,<sup>a</sup> Dongni Zhao,<sup>a,b</sup> Peng Wang,<sup>a</sup> Wenbiao Liang,<sup>a</sup> and Shiyu Li<sup>\*a,b,c</sup>

<sup>a</sup> *School of Petrochemical Technology, Lanzhou University of Technology, Lanzhou 730050, China*

<sup>b</sup> *Key Laboratory of Low Carbon Energy and Chemical Engineering of Gansu Province, Lanzhou 730050, China*

<sup>c</sup> *Gansu Engineering Laboratory of Cathode Material for Lithium-ion Battery, Lanzhou, 730050, China*

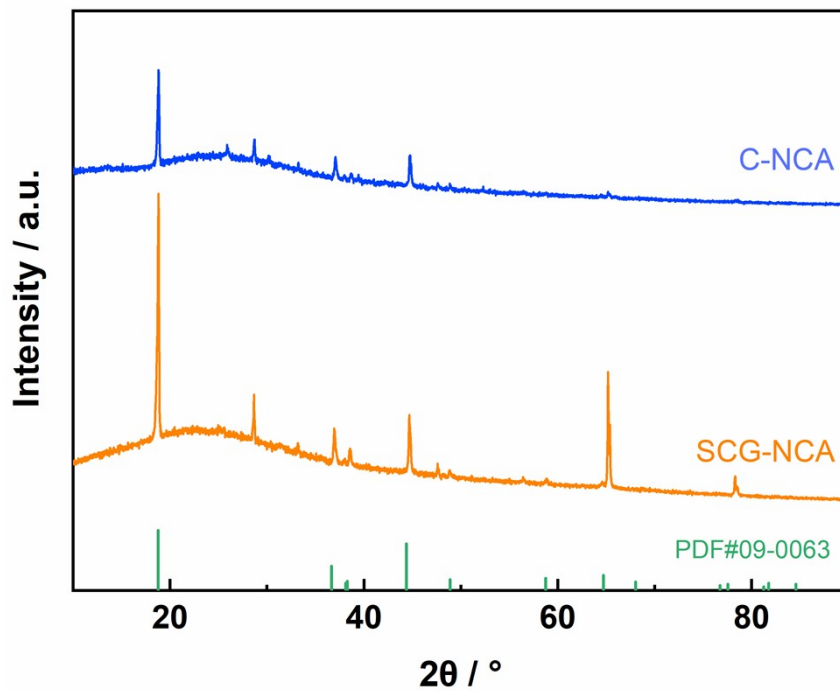

**Fig. S1** XRD patterns of C-NCA and SCG-NCA after 200 cycles at 25 °C

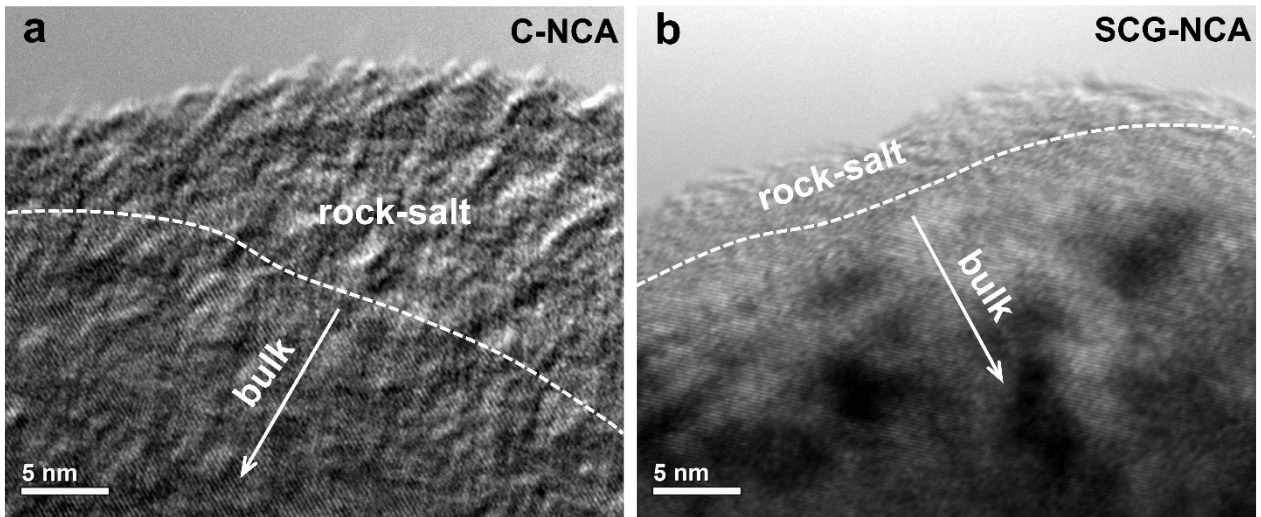

**Fig. S2** HRTEM images for (a) C-NCA and (b) SCG-NCA after 200 cycles at 25 °C
